# Supplementary material
Source: MDPI journal article supplement (https://www.mdpi.com/1996-1073/15/13/4728)
Supplement: s1 [file s1]

## Supporting Information

### Nickel Hydroxide Nanofluid Cathodes with High Solid Loadings and Low Viscosity for Aqueous Flow Batteries

Sujat Sen <sup>1,\*</sup>, Elahe Moazzen <sup>2,3</sup>, Sinjin Acuna <sup>4</sup>, Evan Draxler <sup>1</sup>, Carlo U. Segre <sup>3,4</sup> and Elena V. Timofeeva <sup>2,4</sup>

<sup>1</sup>Department of Chemistry and Biochemistry, University of Wisconsin La Crosse, La Crosse, WI 54601, USA;

<sup>2</sup>Department of Chemistry, Illinois Institute of Technology, Chicago, IL 60616, USA;

<sup>3</sup>Department of Physics & CSRRI, Illinois Institute of Technology, Chicago, IL 60616, USA;

<sup>4</sup>Influit Energy, LLC, Chicago, IL 60612, USA;

\* Correspondence: ssen@uwlax.edu

#### Conversion of weight into volume fraction

The weight fraction,  $w$  can be converted into volume fraction ( $\phi$ ) as follows:

Weight fraction,  $w = m_p / (m_p + m_f)$ , expressed as percent

$$\text{or } 1/w = (1 + m_f/m_p)$$

$$\text{or } m_f/m_p = (1-w)/w \quad (S1)$$

$$\text{and Volume fraction, } \phi = V_p / (V_p + V_f), \text{ expressed as percent} \quad (S2)$$

where, subscripts 'p' and 'f' denote nanoparticle and base fluid respectively. Using density ( $d = m/v$ ), we can write equation S2 as

$$\phi = (m_p/d_p) / (m_p/d_p + m_f/d_f)$$

$$\text{or } 1/\phi = 1 + (m_r \cdot d_p)/(d_r \cdot m_p) \quad (\text{S3})$$

Substituting equation S1 in S3, we get

$$1/\phi = 1 + [(1-w)/w] \cdot [d_p/d_r] \quad (\text{S4})$$

At 298K, assuming a density of 4.1 g/cm<sup>3</sup> for nickel hydroxide, and water as the base fluid with a density of 0.997 g/cm<sup>3</sup>, we get

$$\phi = w / (4.112 - 3.112w) \quad (\text{S5})$$

$$\text{or } w = 4.112 \phi / (1 + 3.112 \phi) \quad (\text{S6})$$

which is graphically shown in figure S1.

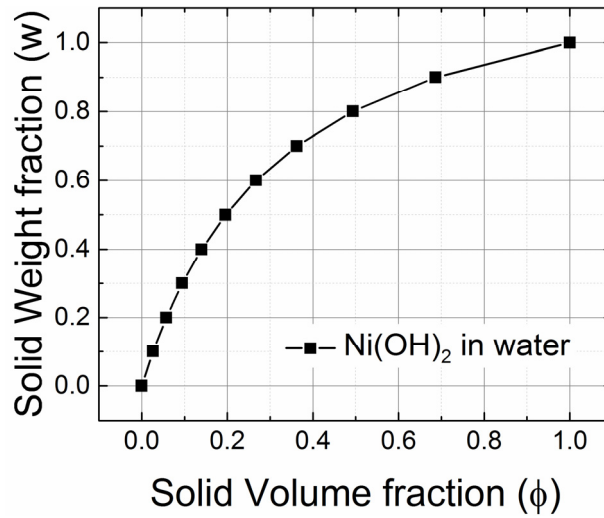

**Figure S1.** Graphical depiction of the relationship between weight and volume fraction for Nickel (II) hydroxide nanofluids in water.

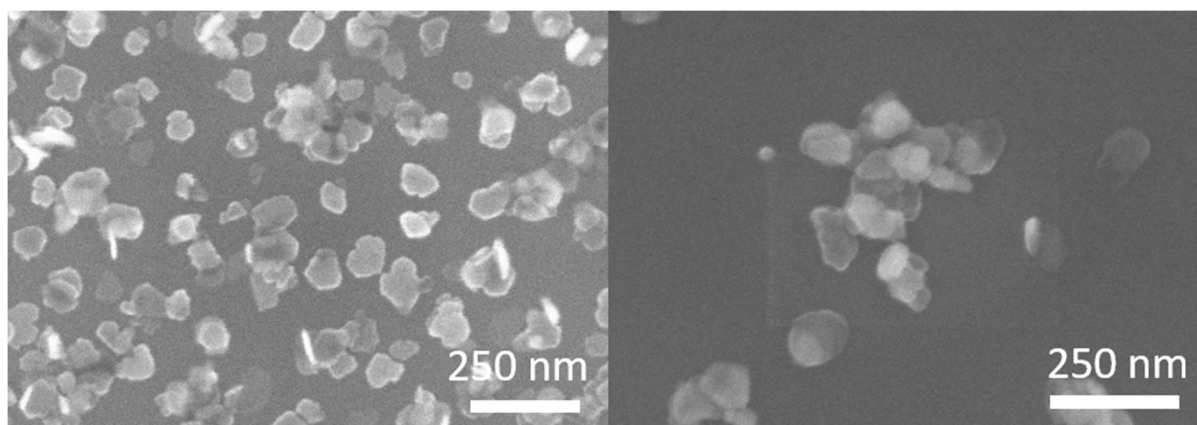

**Figure S2.** SEM images of (a) pristine Nickel (II) hydroxide nanoparticles ( $\text{Ni}(\text{OH})_2$ ) and (b) sulfonated nickel hydroxide nanoparticles ( $\text{Ni}(\text{OH})_2\text{-S}$ )

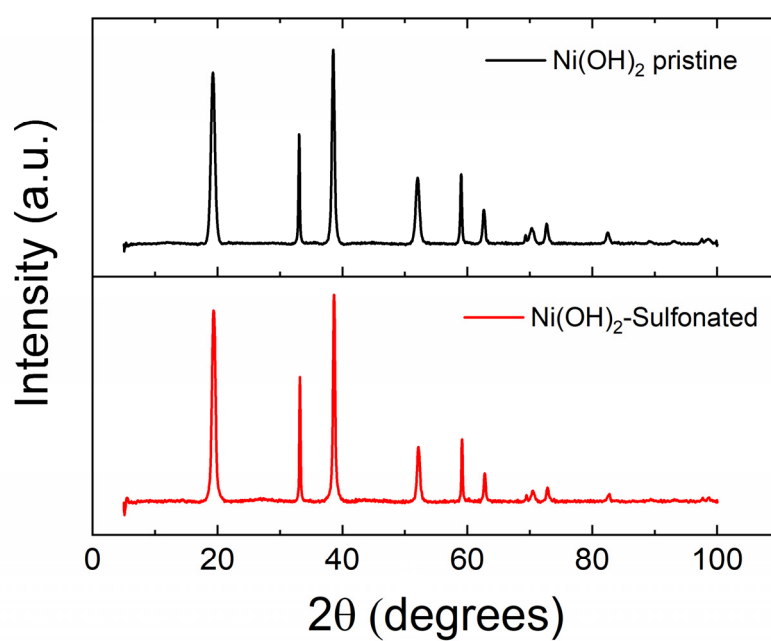

**Figure S3.** XRD patterns of pristine Nickel (II) hydroxide nanoparticles ( $\text{Ni}(\text{OH})_2$ ) and sulfonated nickel hydroxide nanoparticles ( $\text{Ni}(\text{OH})_2\text{-S}$ ) using a Cu K-alpha source, 0.15406 nm

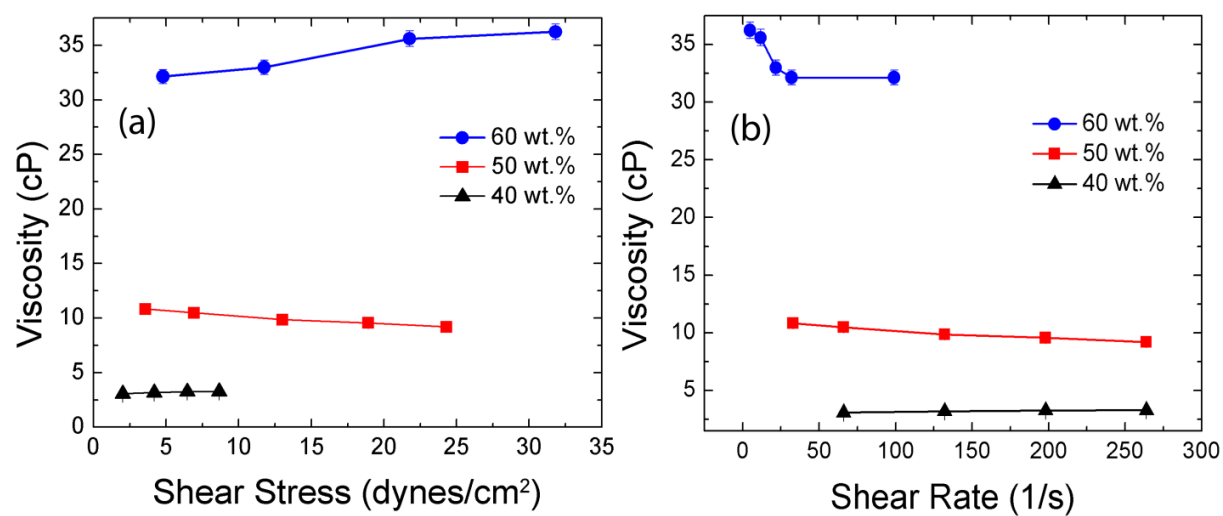

**Figure S4.** Variation in viscosity as a function of (a) shear stress and (b) shear rate for sulfonated nickel hydroxide nanofluids (Ni(OH)<sub>2</sub>-S) at room temperature (with torque >10% and <90%)
